# Supplementary material for: Improved Efficiency and Robustness in qPCR and Multiplex End-Point PCR by Twisted Intercalating Nucleic Acid Modified Primers
Source: PLOS journal article supplement (doi:10.1371/journal.pone.0038451), 2012-06-06
Supplement: S1 (10.1371/journal.pone.0038451.s001) [file journal.pone.0038451.s001]

1 TTGGGCGGCGGGCTGAAGGCTGTTTGGCAGCTCGAGCAAGACGTATCCGTTGCCGGCGGGCGGCGGACCCGTTGGG  
 80 GTAACAGGGAATCCTTTATCGGCTTGGCAGGCGAATTCGGCACGGCGCTCGCCGGTTCGCGTTGCCGAATCCGTTTGA  
 160 CGATGCCAGCAAAGCCATTGATCCTTGGGACAGCAATAATAATGTGGCTTCGCAATTGGGTATTTTCAAACGCCAC  
 230 GACGGTATGCCGGTTTCCGTGCGTTACGATTCCCCCGAATTTTCGGTTTTCAGCGGCAGCAATTCAAATTTGTTCCGA  
 310 GTCAAAACAGCAAGTCCGCCTATACGCCCTGCTACTTTTACGCTGGAAAGTAATCAGATGAAACCAAGTTCCGGCTGT  
 390 TGTCCGCAAGCCGGGGTTCGGATGTGTATTATGCCGGTCTGAATTACAAAATATGGCGGCTTTTTCGGAAATTTATGCC  
 460 CTTAAATATGCGAAACACGCCAATGAGGGGCATGATGCTTTCTTTTGTTCCTTGCTCGGCAGAGCGAGTGATACCG  
 540 ATCCATTGAAAAACCATCAGGTACACCCGCTGACGGGCGGCTATGGGGAAGGCGGCTTGAAATCTCGCCTTGGCGGC  
 610 TCAGTTGGATTGTCTGAAAATGCCGACAAAACCAAAAACAGTACGACCGAAATTGCCGCCACTGCTTCCTACCGC  
 690 TTCGGTAATACAGTCCCGCGCATCAGCTATGCCCATGGTTTTCGACTTTGTGGAACGCAGTCAGAAACGCGAACATA  
 770 CCAGCTATGATCAATCATCGCCGGTGTGATTACGATTTTCCAAGCGCATTCCGCCATCATGTCTGCCGCTTG  
 840 GCTGAAACGAAATACCGGCATCGGCAACTACACTCAAATTAATGCCGCCCTCCGTTGGTCTGCGCCACAAATTCTAA

gttcagcggcagcattca / zgttcagcggcagcattca  
 ccggaactggtttcatctg / zccggaactggtttcatctg

**Supplementary Figure S1.** The *Neisseria gonorrhoeae* *porA* pseudogene nucleotide sequence based on *N. gonorrhoeae* NCCP11945 with indication of match primers (in green). GenBank sequence CP001050.1 from nucleotide 736237 to 737148 (912 nucleotides) equaling locus tag NGK 0907 and protein ID ACF29586.1. Presented in Geneious Pro v5.4.3. Primer sequences were based on Hjemevoll, S.O., Olsen, M.E., Sollid, J.U., Haaheim, H., Unemo, M. and Skogen, V. (2006) A fast real-time polymerase chain reaction method for sensitive and specific detection of the *Neisseria gonorrhoeae* *porA* pseudogene. *J. Mol. Diagn.*, **8**, 574-581.
